# Supplementary material
Source: PubMed Central journal article supplement (PMC3787069)
Supplement: NIHMS514463-supplement-1_si_001.pdf [file NIHMS514463-supplement-1_si_001.pdf]

**Molecular Simulations of Aromatase Reveal New Insights Into the  
Mechanism of Ligand Binding**

Jiho Park<sup>1</sup>, Luke Czapla<sup>1</sup>, Rommie E. Amaro<sup>1</sup>

<sup>1</sup> *Department of Chemistry and Biochemistry, University of California, San Diego, La  
Jolla, California, 92093-0340 USA*

**Supporting Information**

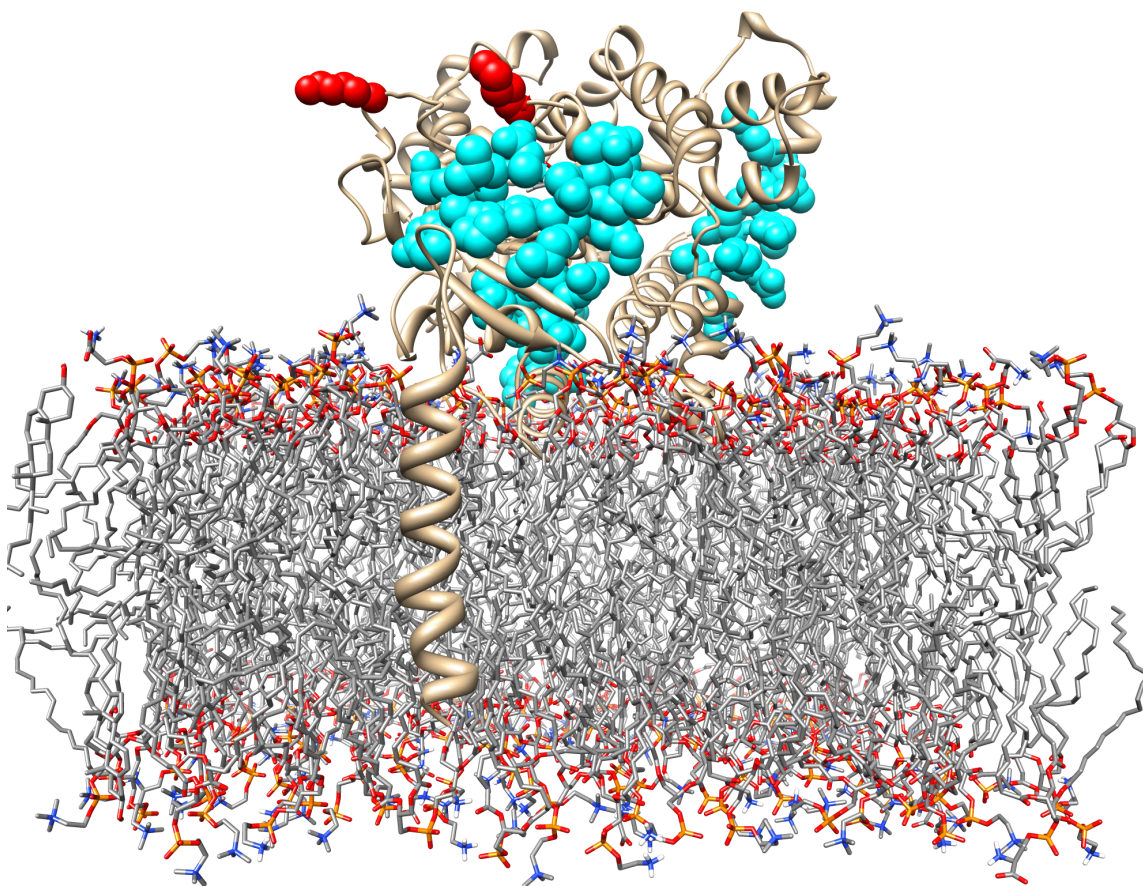

**Figure S1:** Illustration of the solvent-exposure of epitopes (cyan) and cytochrome P450 reductase binding residues (red) in the assembled model of membrane-bound aromatase.

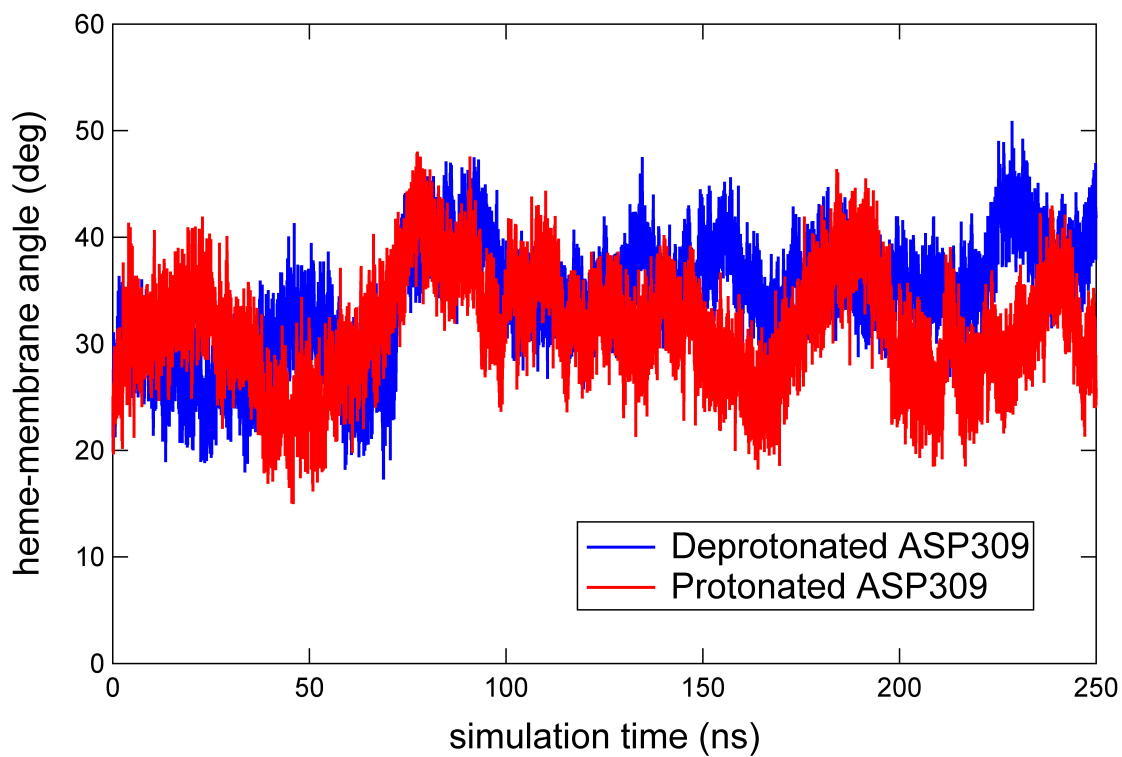

**Figure S2:** Illustration of the angle between the normal to the plane of the heme and the normal to the plane of the membrane (the z-axis) in both trajectories.

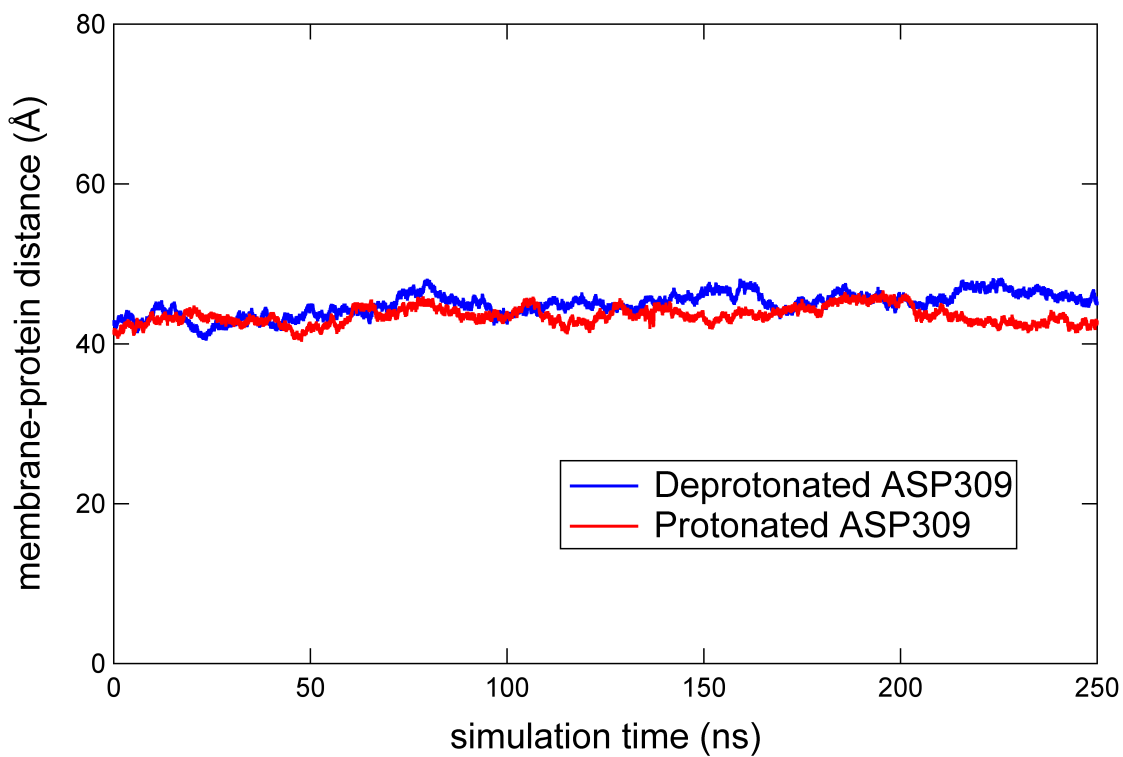

**Figure S3:** Illustration of the vertical distance between aromatase and the center of the membrane in both trajectories. The center of mass of the non-hydrogen atoms of protein that are present in the crystal structure (PDB accession code 3EQM) is used as the position of the protein.

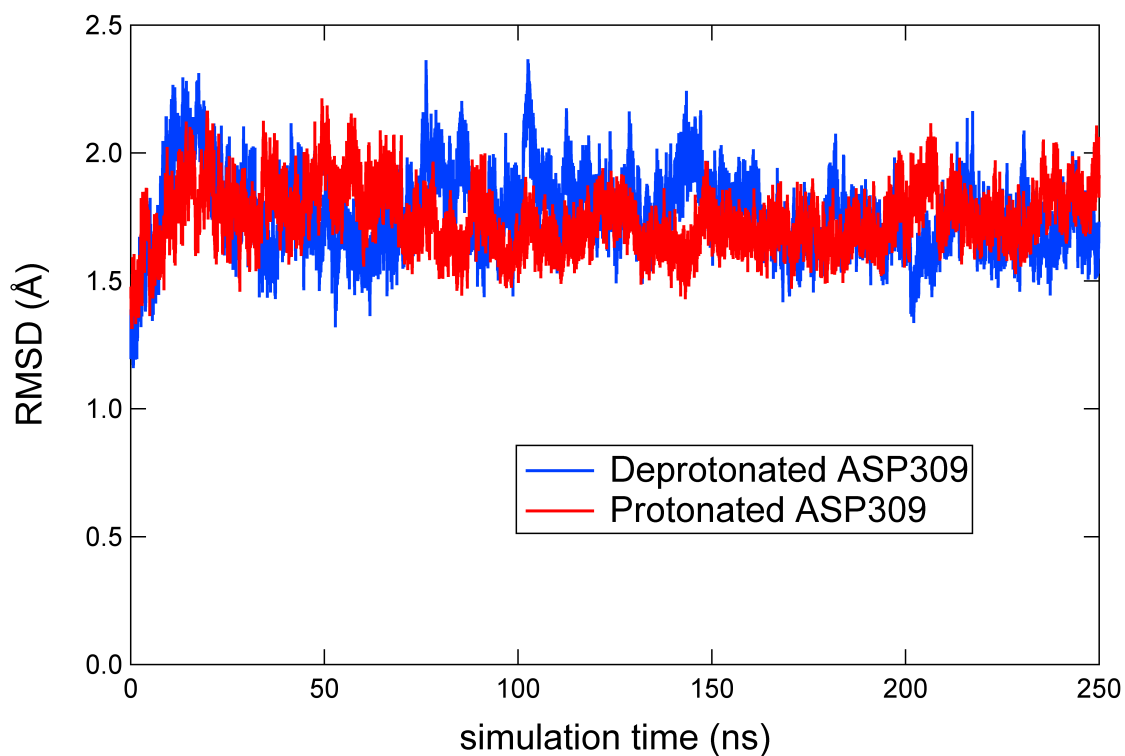

**Figure S4:** Illustration of the relative RMSD for simulated trajectories of aromatase with both a protonated and deprotonated Asp-309 residue. The relative RMSD of protein non-hydrogen atoms of residues 45-496 are reported by aligning the structures from the trajectories to the original crystal structure (PDB accession code 3EQM).

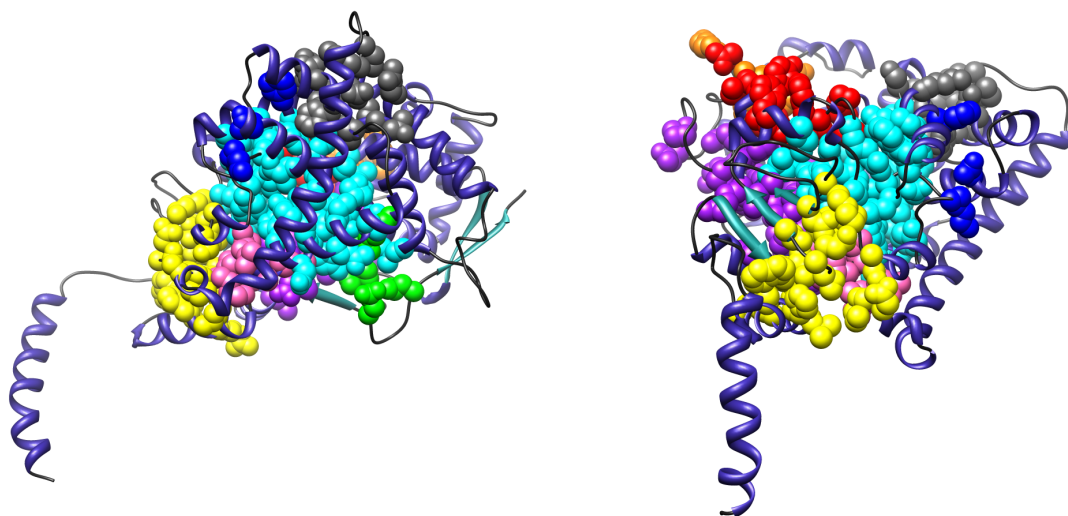

**Figure S5:** Depiction of the nine consensus sites identified by FTprod after computational solvent mapping calculations. Color Key: CS1 – Cyan, CS2 – Red, CS3 – Gray, CS4 – Orange, CS5 – Yellow, CS6 – Pink, CS7 – Purple, CS8 – Green, CS9 – Blue

**Table S1:** Results of the GROMOS++ clustering of trajectory ensembles in the deprotonated and protonated trajectories.

**Protonated Asp-309 Trajectory Clustering**

| Cluster Number | Number of Frames | Percentage of Trajectory |
|----------------|------------------|--------------------------|
| 1              | 6149             | 61.49                    |
| 2              | 1426             | 14.26                    |
| 3              | 983              | 9.83                     |
| 4              | 577              | 5.77                     |
| 5              | 441              | 4.41                     |
| 6              | 133              | 1.33                     |
| 7              | 87               | 0.87                     |
| 8              | 70               | 0.70                     |
| 9              | 44               | 0.44                     |
| 10             | 33               | 0.33                     |
| 11             | 14               | 0.14                     |
| 12             | 11               | 0.11                     |
| 13             | 10               | 0.10                     |
| 14             | 9                | 0.09                     |
| 15             | 6                | 0.06                     |
| 16             | 5                | 0.05                     |
| 17             | 1                | 0.01                     |
| 18             | 1                | 0.01                     |

**Deprotonated Asp-309 Trajectory Clustering**

| Cluster Number | Number of Frames | Percentage of Trajectory |
|----------------|------------------|--------------------------|
| 1              | 6687             | 66.88                    |
| 2              | 1092             | 10.92                    |
| 3              | 564              | 5.64                     |
| 4              | 420              | 4.20                     |
| 5              | 384              | 3.84                     |
| 6              | 320              | 3.20                     |
| 7              | 138              | 1.38                     |
| 8              | 83               | 0.83                     |
| 9              | 58               | 0.58                     |
| 10             | 53               | 0.53                     |
| 11             | 39               | 0.39                     |
| 12             | 36               | 0.36                     |
| 13             | 22               | 0.22                     |
| 14             | 22               | 0.22                     |
| 15             | 18               | 0.18                     |

|    |    |      |
|----|----|------|
| 16 | 16 | 0.16 |
| 17 | 13 | 0.13 |
| 18 | 11 | 0.11 |
| 19 | 5  | 0.05 |
| 20 | 5  | 0.05 |
| 21 | 3  | 0.03 |
| 22 | 3  | 0.03 |
| 23 | 2  | 0.02 |
| 24 | 1  | 0.01 |
| 25 | 1  | 0.01 |
| 26 | 1  | 0.01 |
| 27 | 1  | 0.01 |
